# Supplementary material for: A Benchmarking Framework to Catalyze Individual Human Genome Projects
Source: Research Square preprint supplement (doi:10.21203/rs.3.rs-8225271/v1), 2025-12-17
Supplement: Supplementary file 1 [file feebe8855e9a5d845eff8196.pdf]

## Supplementary Material

# Benchmarking Framework to Catalyze Individual Human Genome Projects

Manjushri Kalpande<sup>1</sup>, Apoorva Ganesh<sup>1</sup>, and Subhashini Srinivasan<sup>1,2</sup>

Institute of Bioinformatics and Applied Biotechnology, Biotech Park, GN Ramachandran Rd,  
Electronic City Phase I, Electronic City, Bengaluru, Karnataka 560100, India

### Table of Contents

|                                                                                                                                                                                              |    |
|----------------------------------------------------------------------------------------------------------------------------------------------------------------------------------------------|----|
| <i>Supplementary Figure S1 ( A - W )</i> : shows comparative dot plot of individual chromosomes from genomes ( PJI1, BEB1, ITU1) against virtual markers every 100kb from hg38 assembly..... | 13 |
| <i>Supplementary Figure S2 ( i - iv )</i> : shows comparative dot plot of individual chromosomes from few genomes in which p and q arms are splitting .....                                  | 14 |

## #chromosome 1

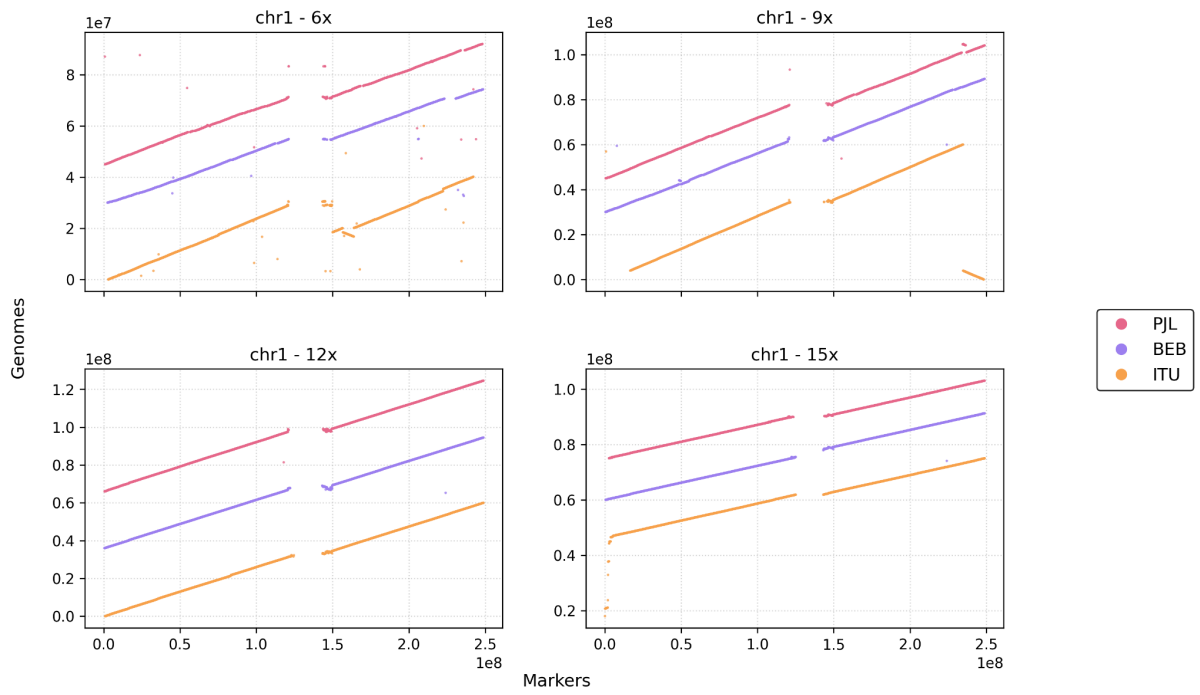

(A)

## #chromosome 2

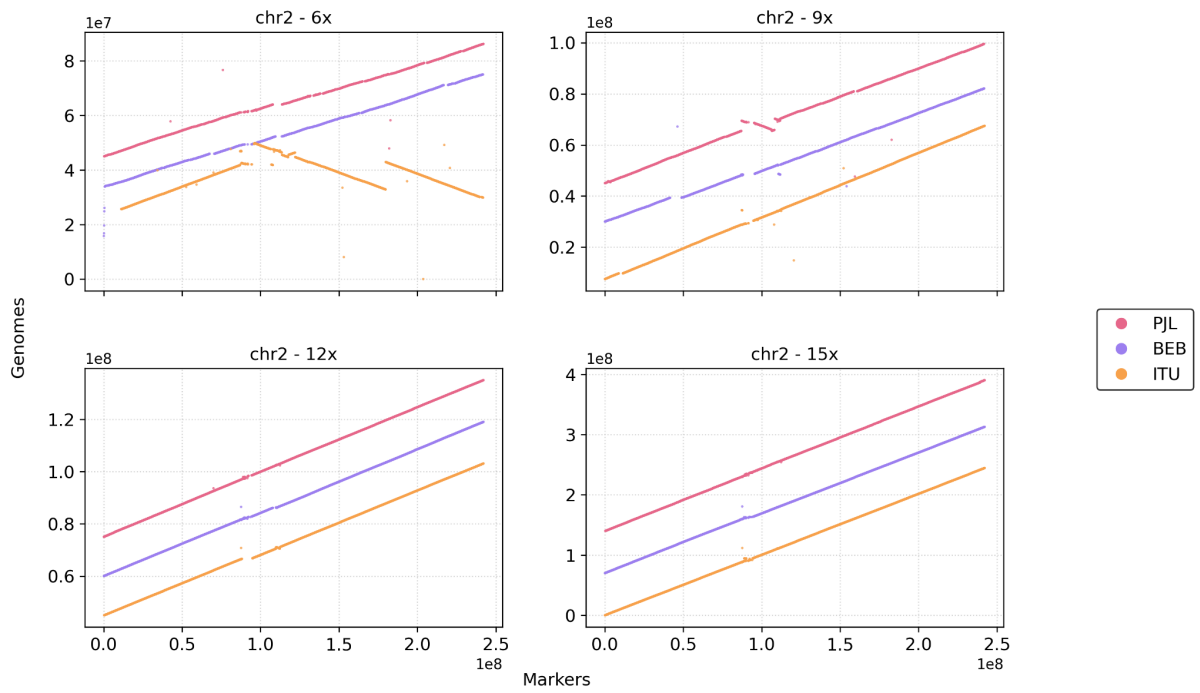

(B)

## #chromosome 3

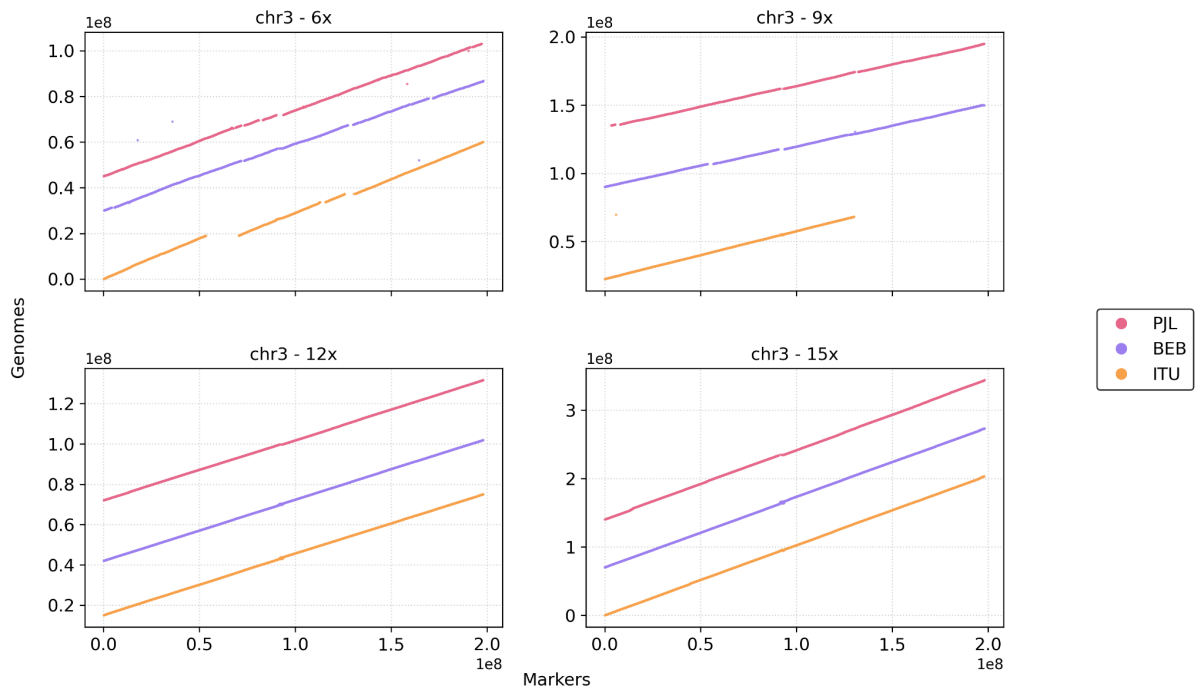

(C)

#chromosome 4

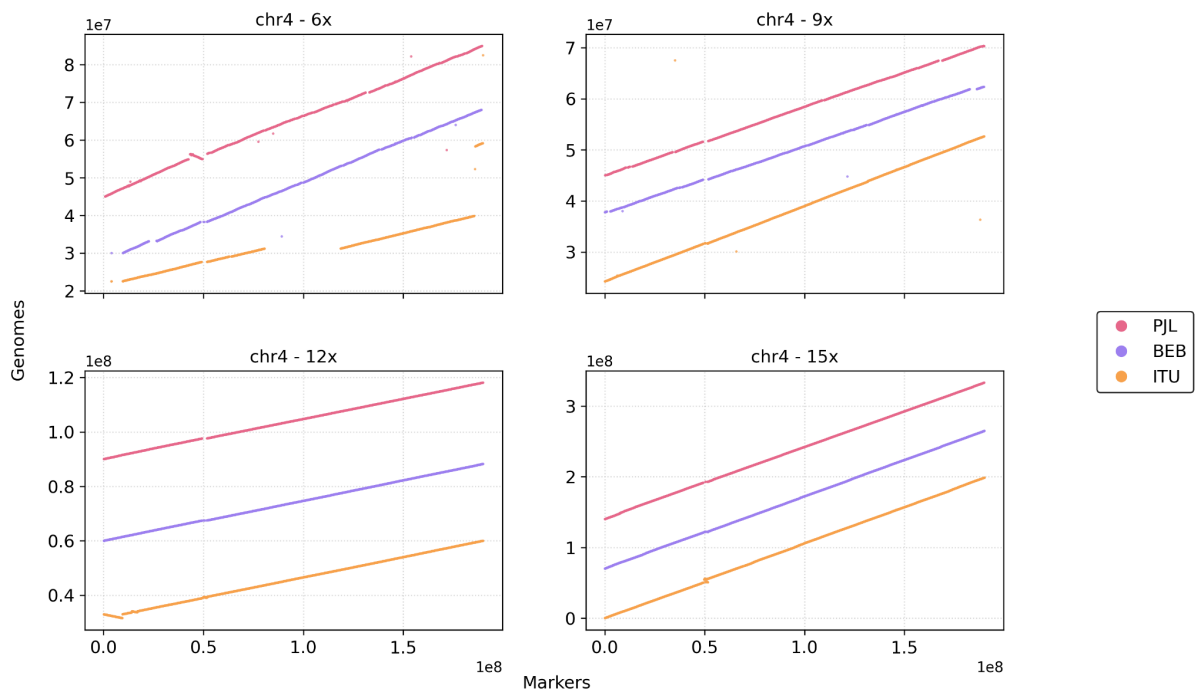

(D)

#chromosome 5

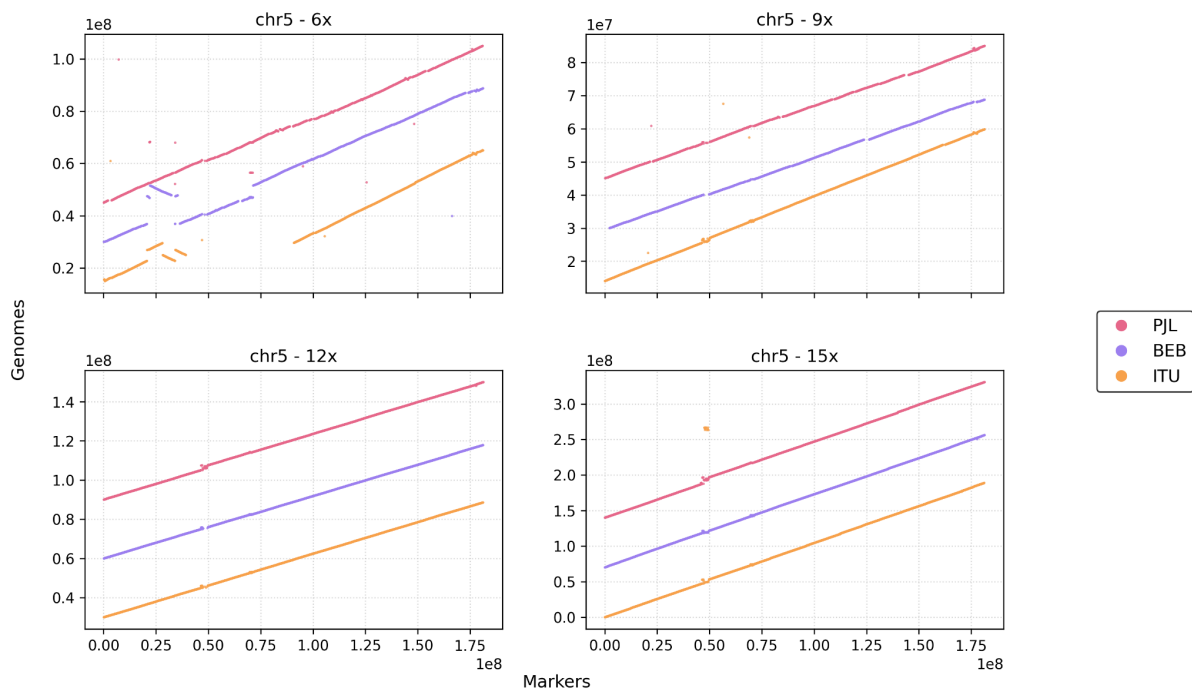

(E)

# chromosome 6

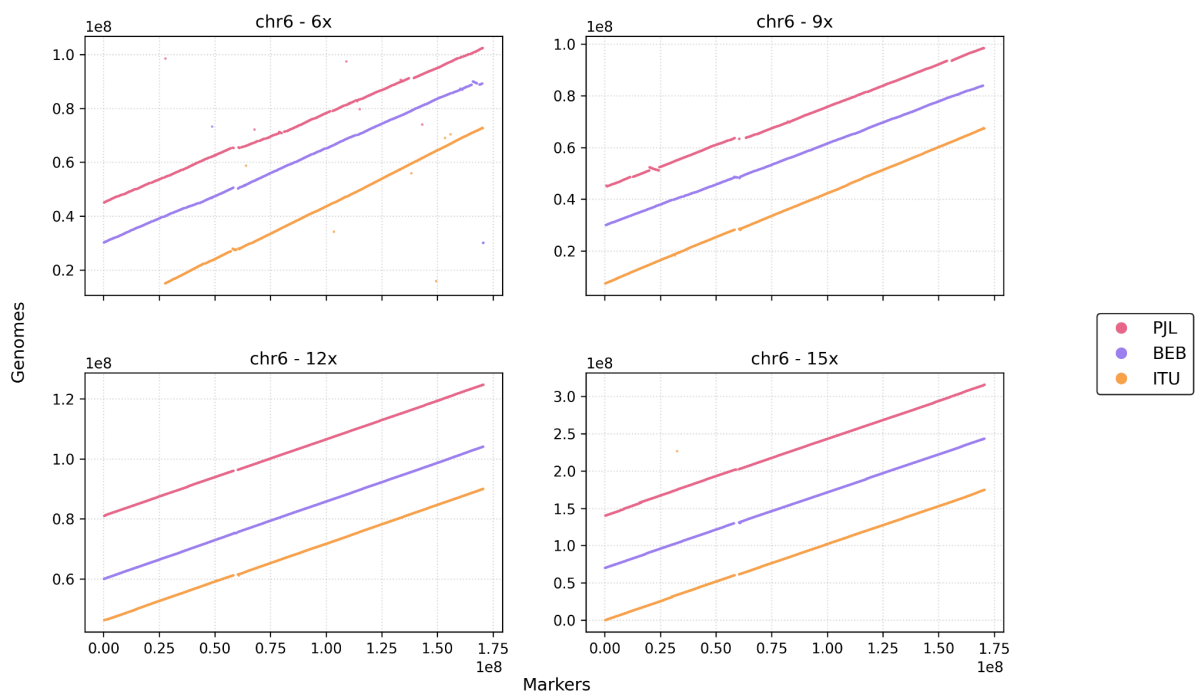

(F)

#chromosome 7

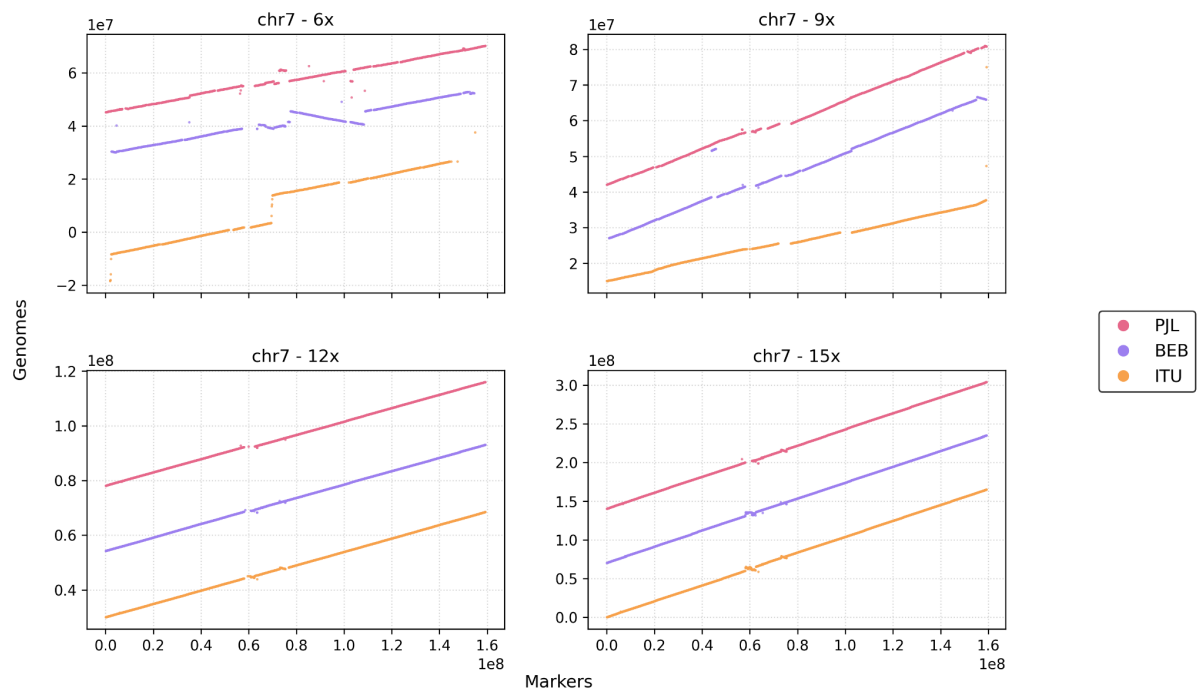

( G )

# chromosome 8

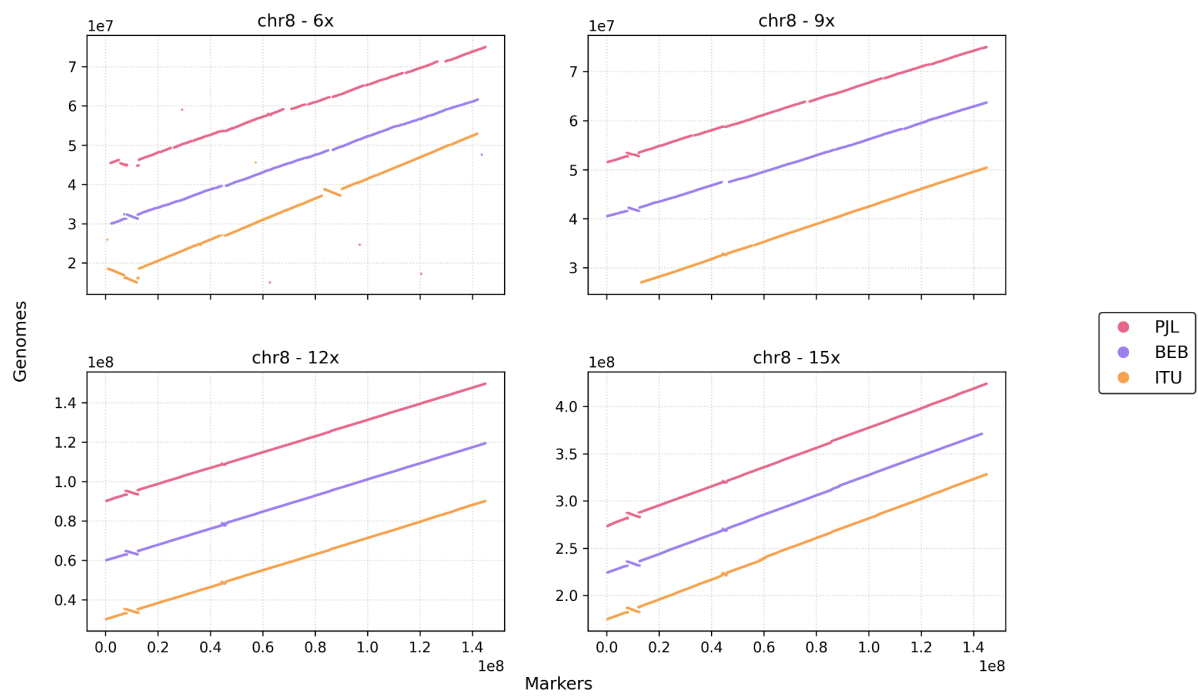

( H )

# chromosome 9

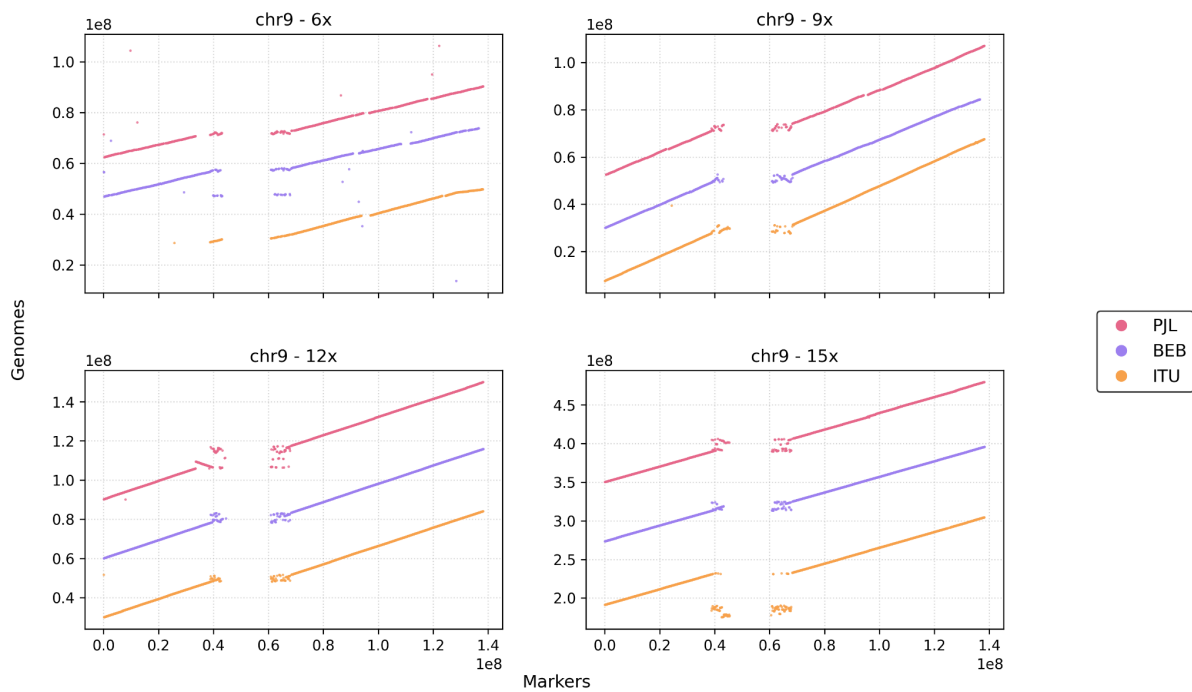

(I)

# chromosome 10

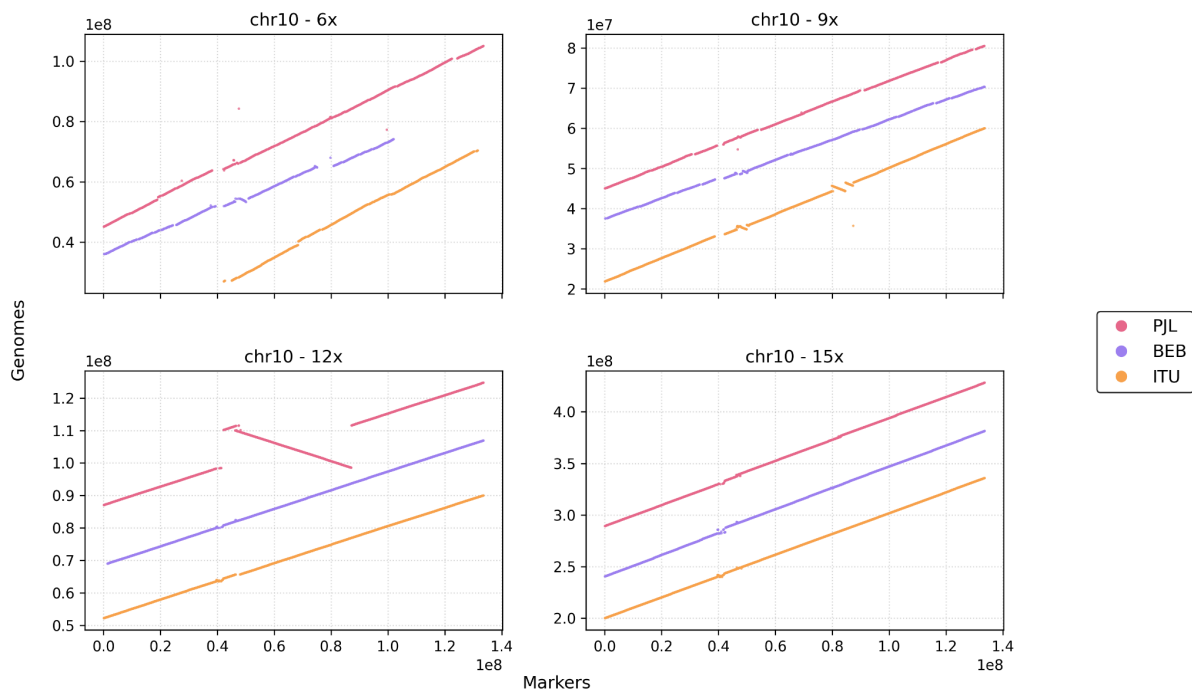

(J)

#chromosome 11

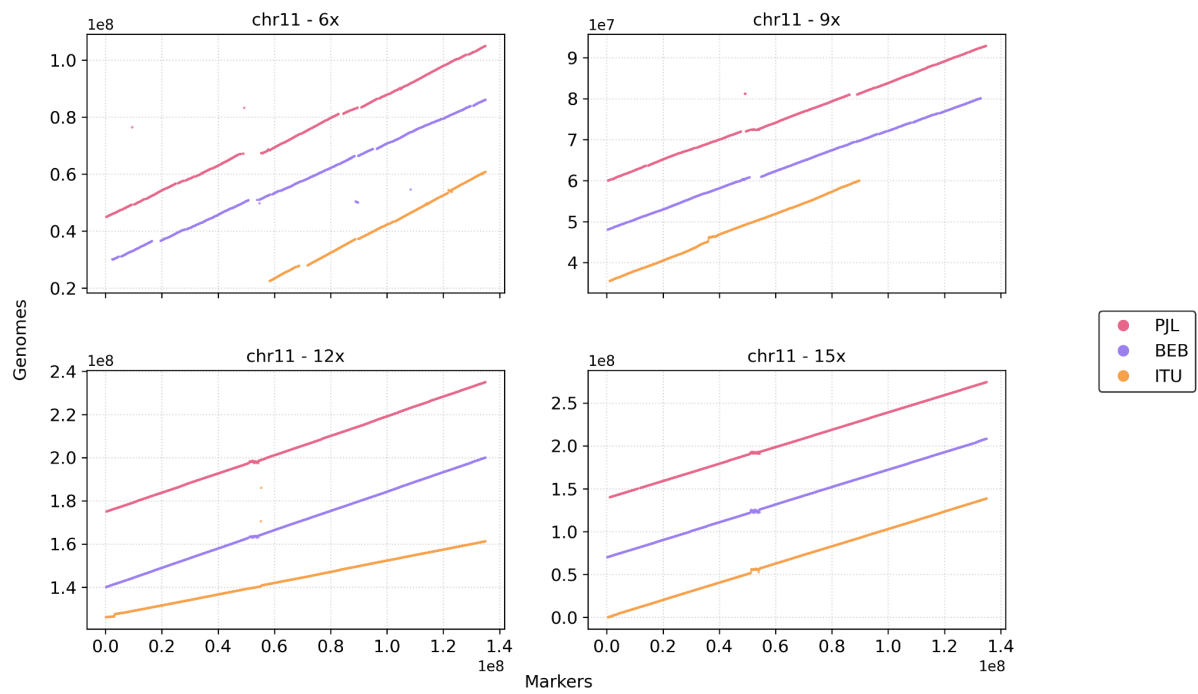

(K)

# chromosome 12

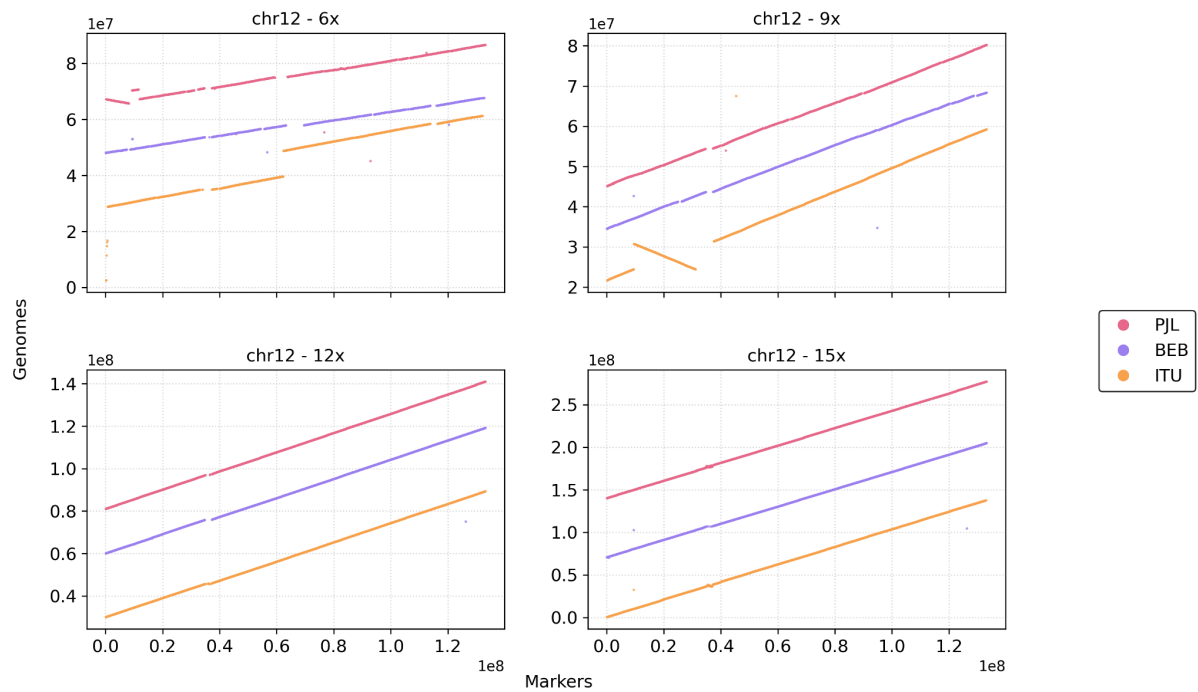

(L)

# chromosome 13

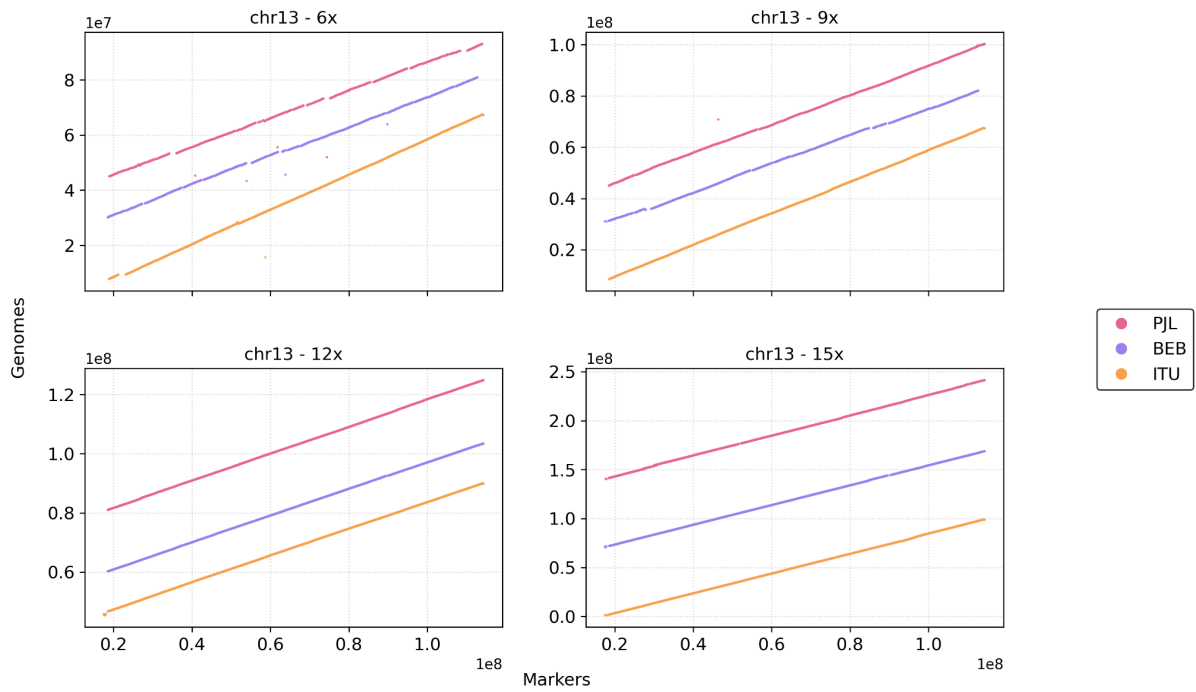

(M)

# chromosome 14

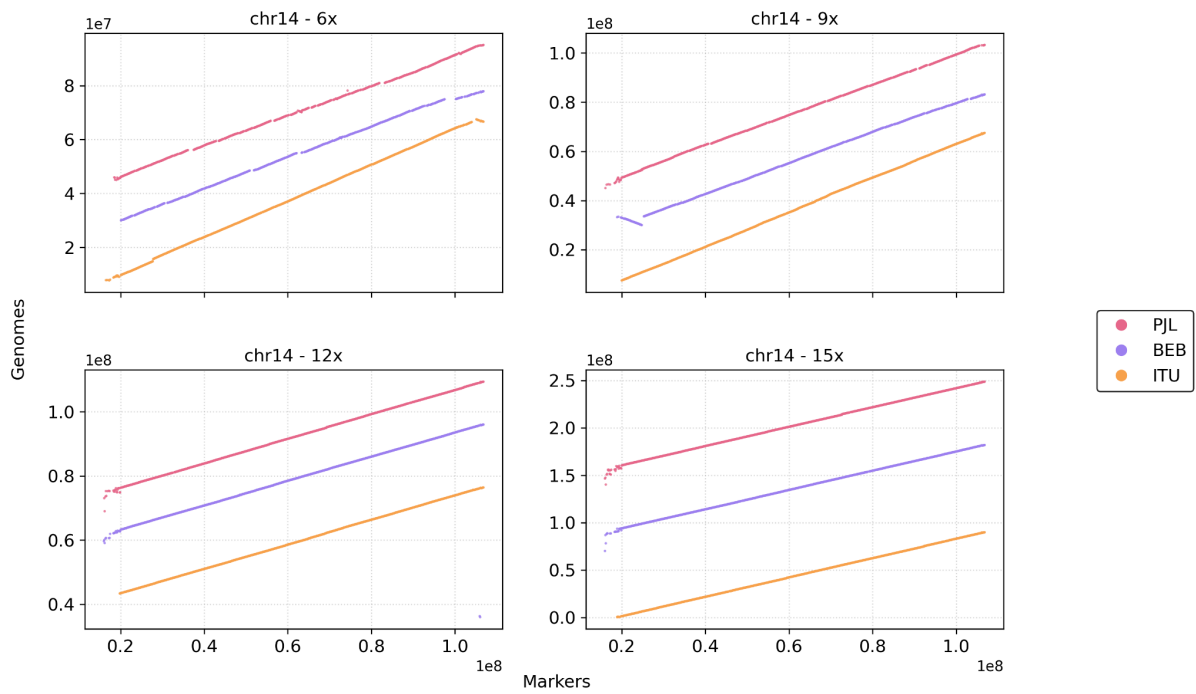

(N)

#chromosome 15



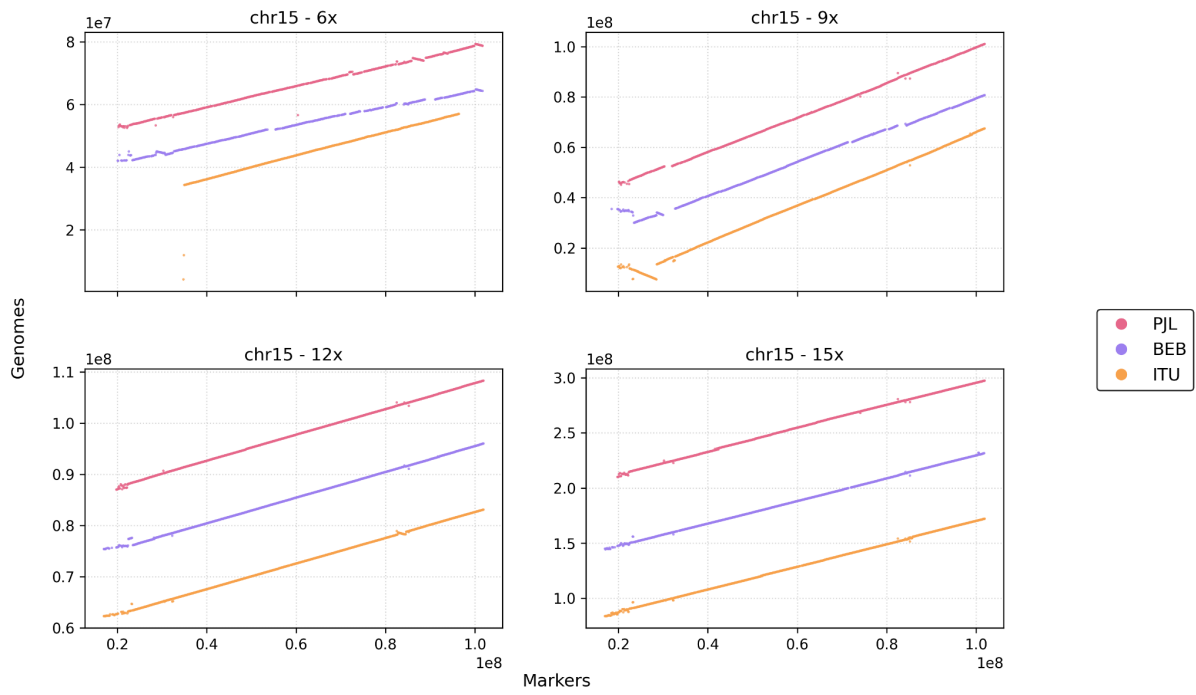

(O)

# chromosome 16

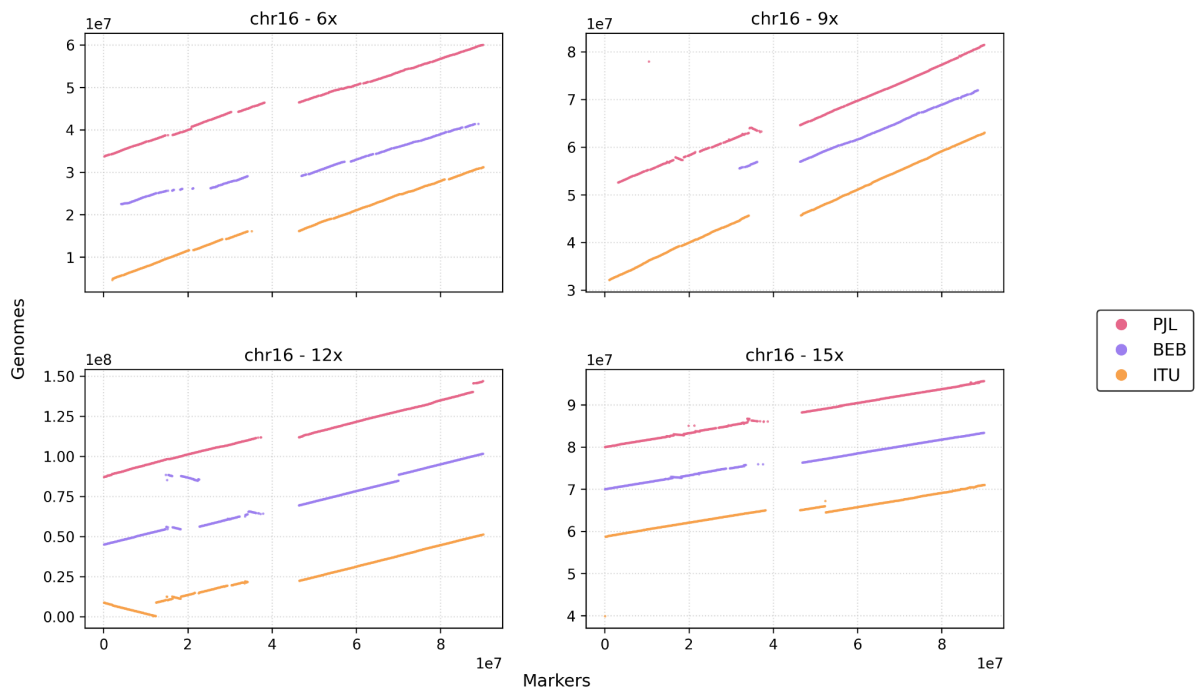

(P)

#chromosome 17

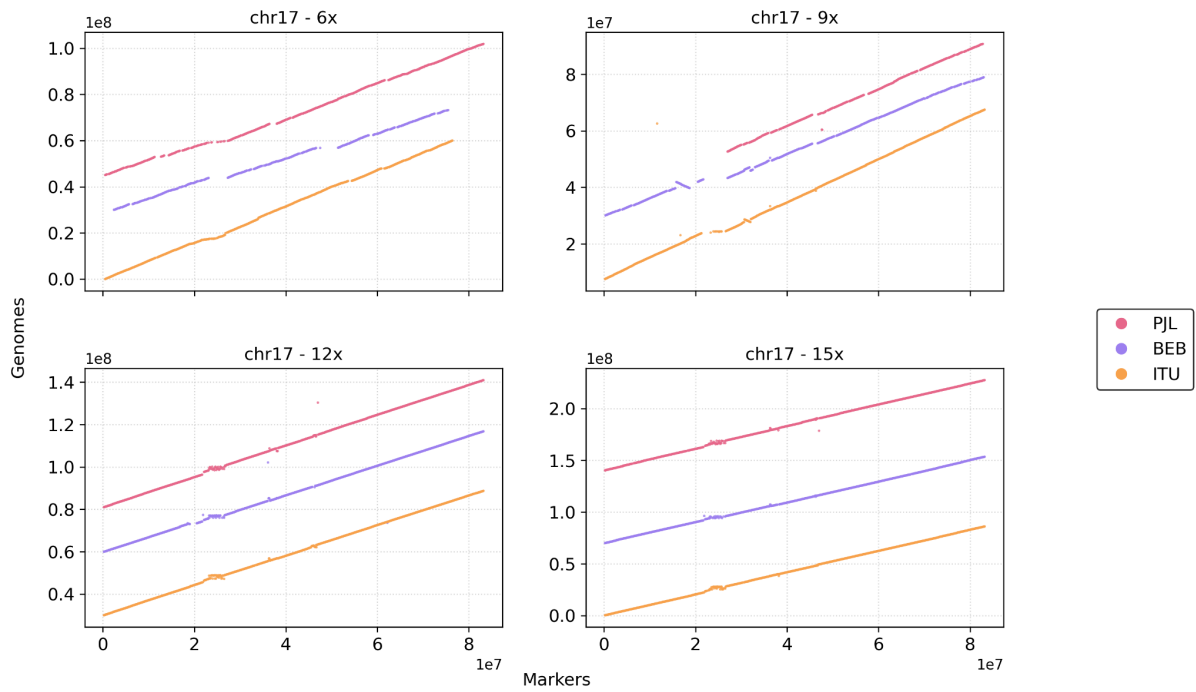

( Q )

# chromosome 18

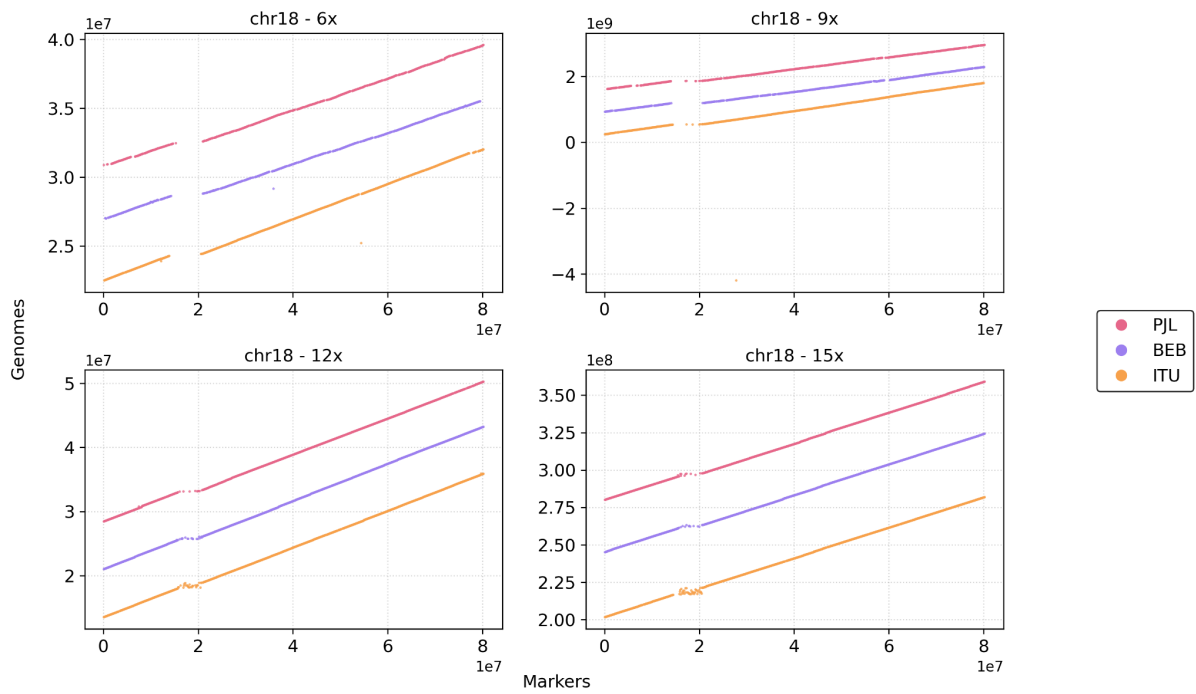

( R )

#chromosome 19

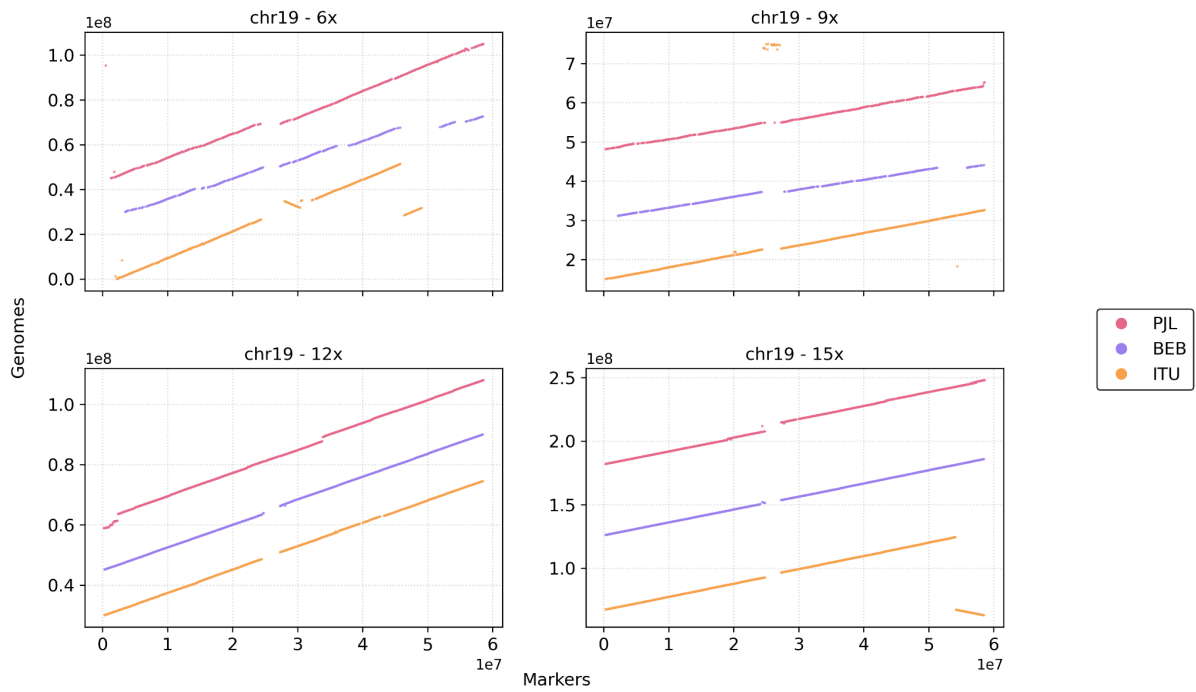

( S )

# chromosome 20

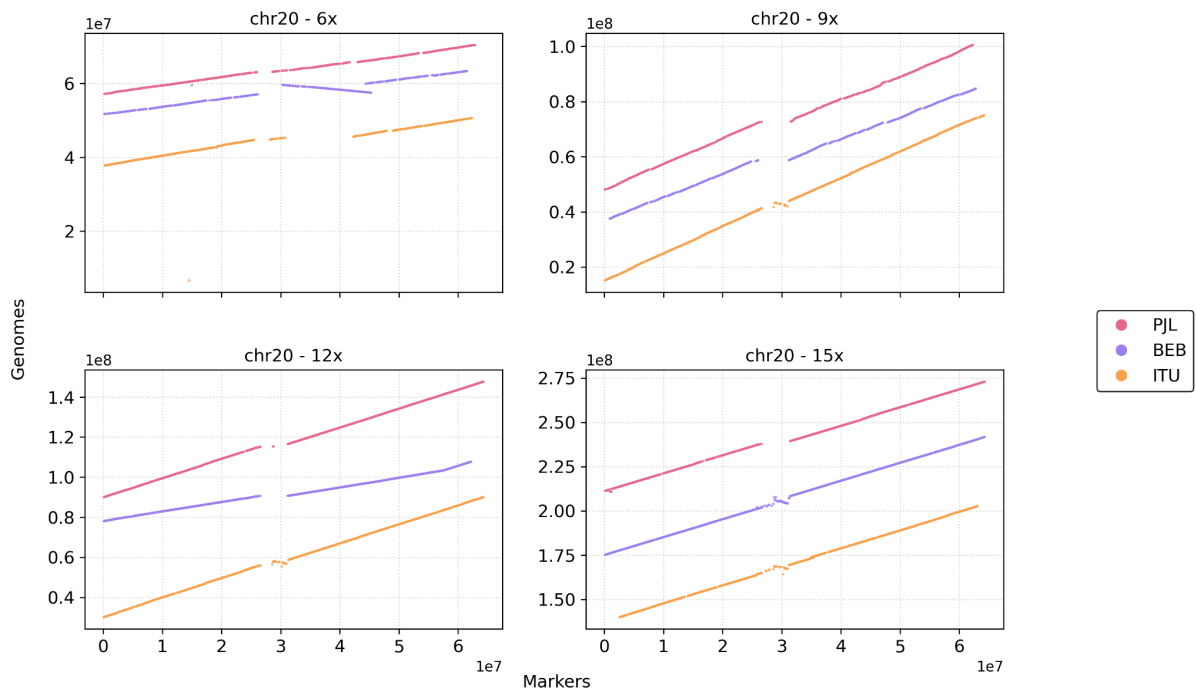

( T )

# chromosome 21

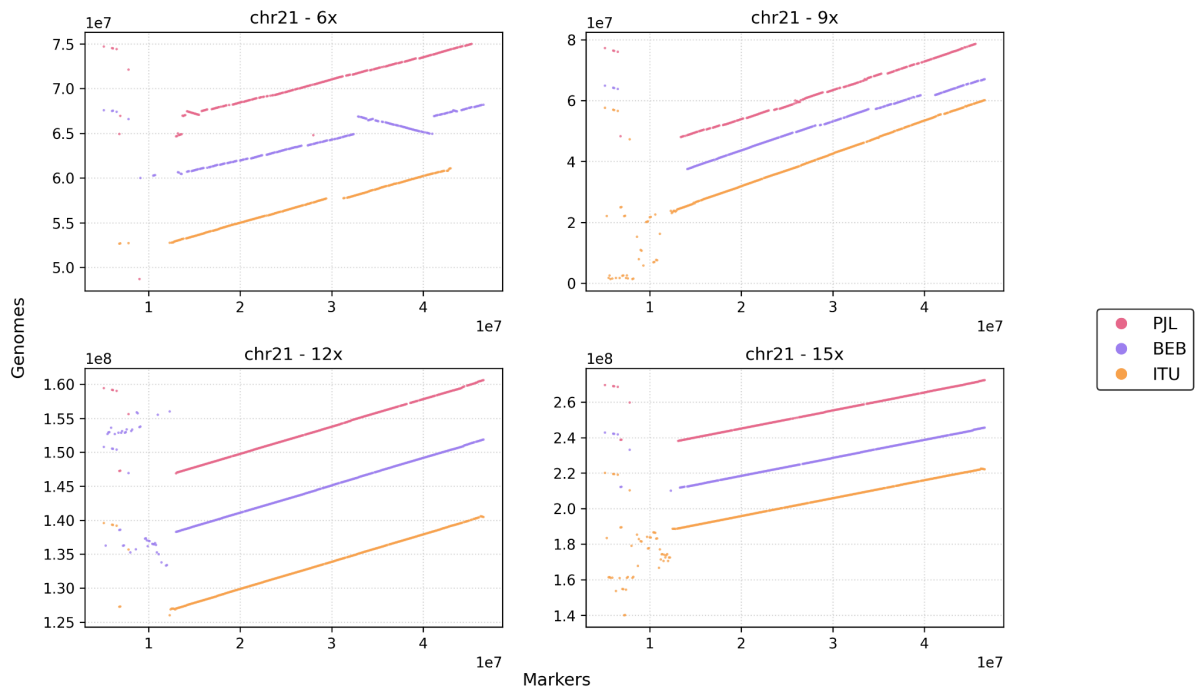

(U)

# chromosome 22

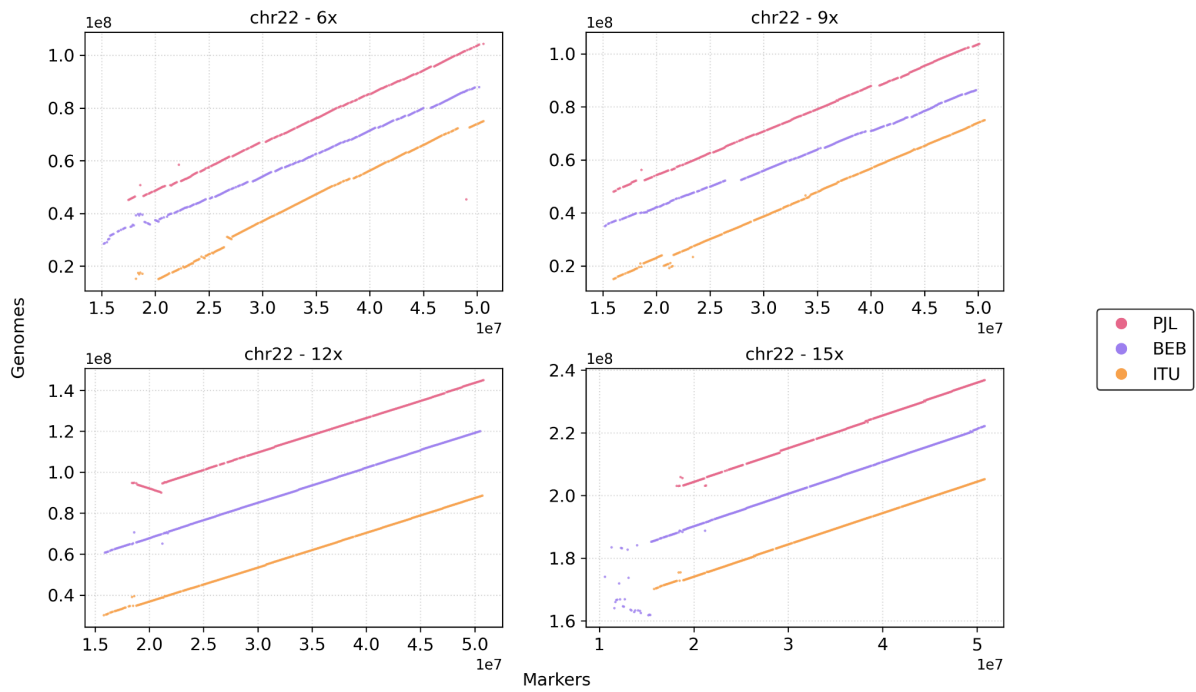

(V)

# chromosome X

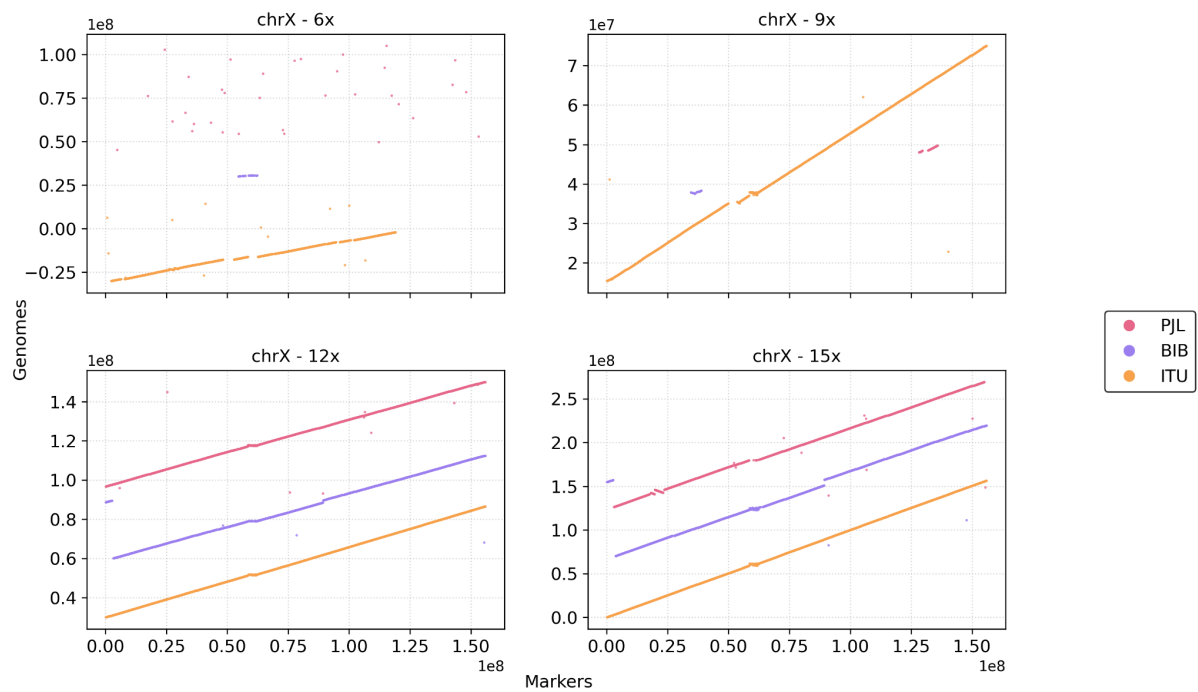

( W )

*Supplementary Figure S1 ( A - W )* : shows comparative dot plot of individual chromosomes from several genomes against virtual markers every 100kb from hg38 assembly.

**# Manual corrected chromosomes before correction**

#chr1\_15x- ITU1

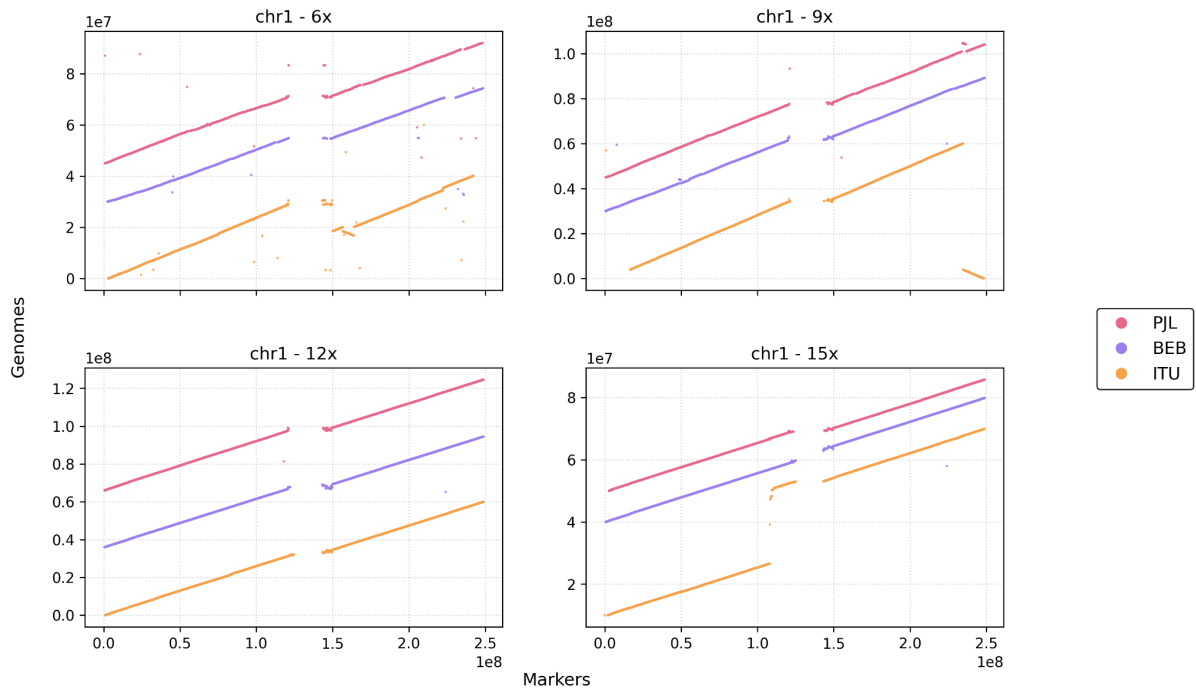

(i)

#chr19\_12x- PjL1

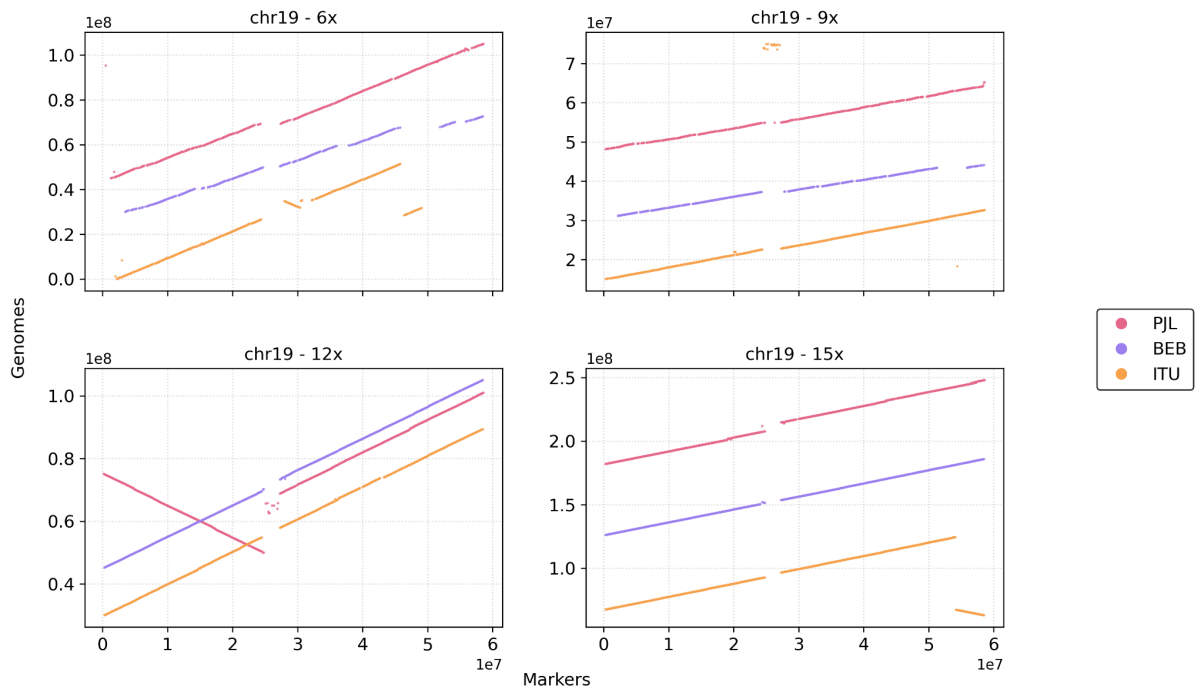

(ii)

#chr11\_ITU-12x

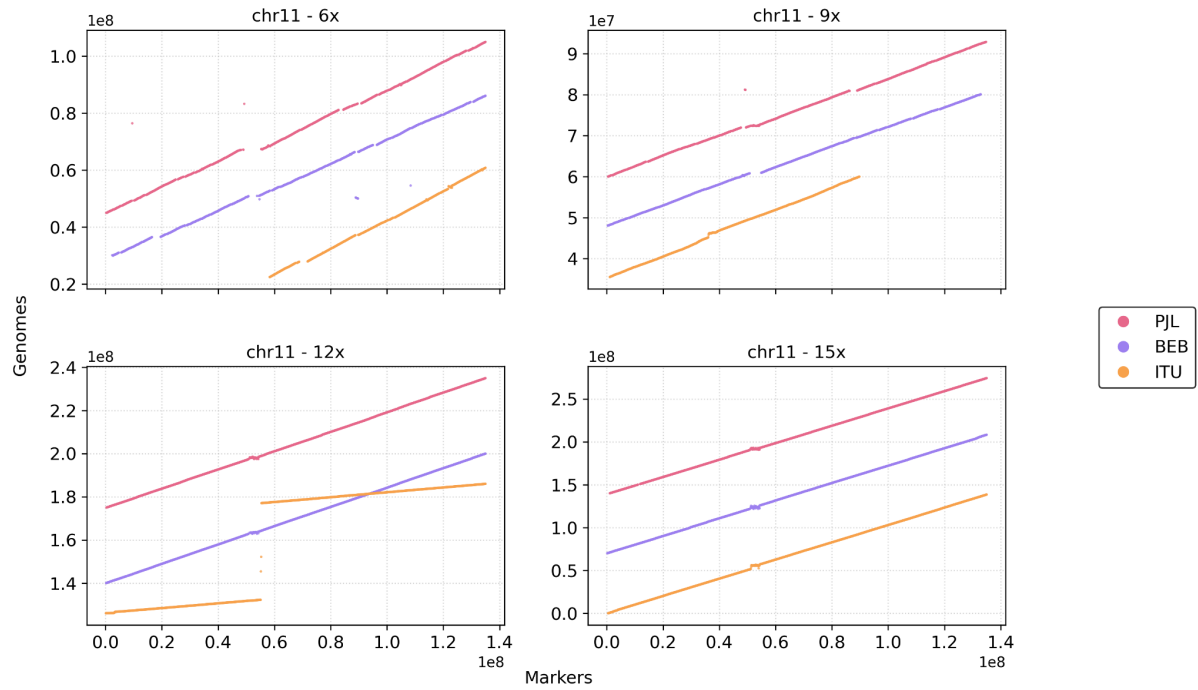

(iii)

#chr16\_15x - ITU1

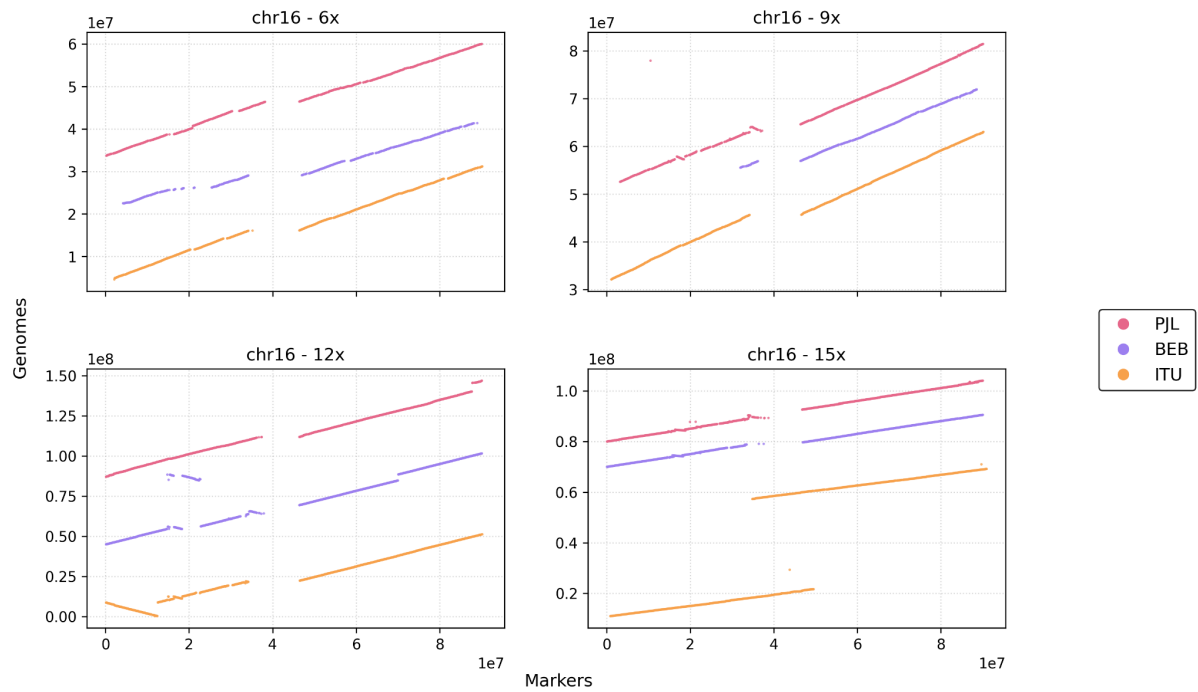

(iv)

*Supplementary Figure S2 (i - iv) : shows comparative dot plot of individual chromosomes from few genomes where p and q arms are splitting*
